# Supplementary material for: Comparative evaluation of MAX-Ti3AlC2 and MXene-Ti3C2 as affinity chromatographic materials for highly selective enrichment of phosphopeptides
Source: Royal Society of Chemistry journal article supplement (doi:10.1039/d0nr07560d), 2020-12-29
Supplement: d0nr07560d1.pdf [file d0nr07560d1.pdf]

**Comparative evaluation of MAX-Ti<sub>3</sub>AlC<sub>2</sub> and 2D MXene-Ti<sub>3</sub>C<sub>2</sub> as affinity chromatography stationary phases for highly selective enrichment of phosphopeptides**

Xiaowei Li<sup>a, b</sup>, Na Zhang<sup>a, b</sup>, Ruizhi Tang<sup>a</sup>, Jiawen Lv<sup>a, b</sup>, Zhen Liu<sup>a, b</sup>, Shujuan Ma<sup>a</sup>,  
Junjie Ou<sup>a, b,\*</sup>, Mingliang Ye<sup>a, b</sup>

<sup>a</sup>CAS Key Laboratory of Separation Science for Analytical Chemistry, Dalian Institute of Chemical Physics, Chinese Academy of Sciences (CAS), Dalian, 116023, China

<sup>b</sup>University of Chinese Academy of Sciences, Beijing, 100049, China

\* To whom correspondence should be addressed:

Prof. JunjieOu

Tel: +86-411-84379576

Fax: +86-411-84379620

E-mail: junjieou@dicp.ac.cn

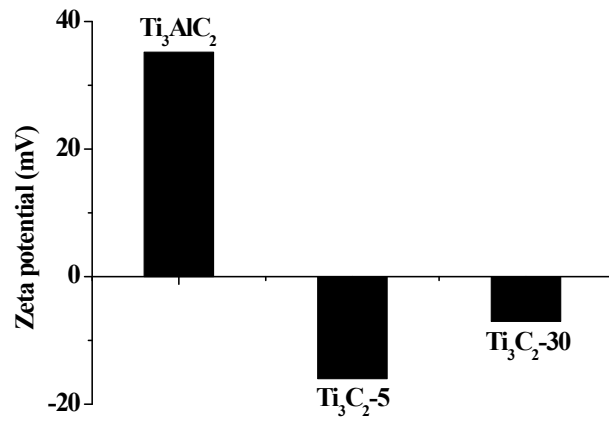

Fig. S1. Zeta potential of  $\text{Ti}_3\text{AlC}_2$ ,  $\text{Ti}_3\text{C}_2-5$  and  $\text{Ti}_3\text{C}_2-30$ .

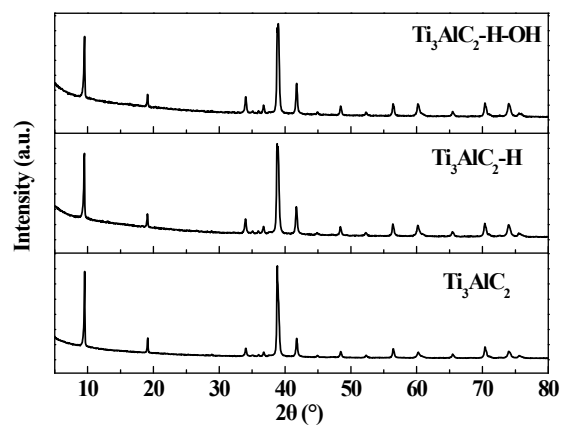

Fig. S2. XRD patterns of  $\text{Ti}_3\text{AlC}_2$ ,  $\text{Ti}_3\text{AlC}_2\text{-H}$  (after treatment with loading and washing solution) and  $\text{Ti}_3\text{AlC}_2\text{-H-OH}$  (after treatment with loading, washing and elution solution).

Table S1. Detail information of phosphoproteins and phosphopeptides enriched from tryptic digest of milk using  $Ti_3AlCl_2$ .

| Phosphoprotein                                                | Phosphopeptide             | Modification                  |
|---------------------------------------------------------------|----------------------------|-------------------------------|
| CASA1_BOVIN Alpha-S1-casein OS=Bos taurus GN=CSN1S1 PE=1 SV=2 | VNELSK                     | Phospho (ST)                  |
| CASA1_BOVIN Alpha-S1-casein OS=Bos taurus GN=CSN1S1 PE=1 SV=2 | YLGYLEQLLR                 | Phospho (Y)                   |
| CASA1_BOVIN Alpha-S1-casein OS=Bos taurus GN=CSN1S1 PE=1 SV=2 | VPQLEIVPNSAEER             | Phospho (ST)                  |
| CASA1_BOVIN Alpha-S1-casein OS=Bos taurus GN=CSN1S1 PE=1 SV=2 | DIGSESTEDQAMEDIK           | Phospho (ST)                  |
| CASA1_BOVIN Alpha-S1-casein OS=Bos taurus GN=CSN1S1 PE=1 SV=2 | DIGSESTEDQAMEDIK           | Oxidation (M); Phospho (ST)   |
| CASA1_BOVIN Alpha-S1-casein OS=Bos taurus GN=CSN1S1 PE=1 SV=2 | DIGSESTEDQAMEDIK           | 2 Phospho (ST)                |
| CASA1_BOVIN Alpha-S1-casein OS=Bos taurus GN=CSN1S1 PE=1 SV=2 | DIGSESTEDQAMEDIK           | Oxidation (M); 2 Phospho (ST) |
| CASA1_BOVIN Alpha-S1-casein OS=Bos taurus GN=CSN1S1 PE=1 SV=2 | YKVPQLEIVPNSAEER           | Phospho (ST)                  |
| CASA1_BOVIN Alpha-S1-casein OS=Bos taurus GN=CSN1S1 PE=1 SV=2 | DIGSESTEDQAMEDIK           | 3 Phospho (ST)                |
| CASA1_BOVIN Alpha-S1-casein OS=Bos taurus GN=CSN1S1 PE=1 SV=2 | YKVPQLEIVPNSAEER           | Phospho (ST); Phospho (Y)     |
| CASA1_BOVIN Alpha-S1-casein OS=Bos taurus GN=CSN1S1 PE=1 SV=2 | VNELSKDIGSESTEDQAMEDIK     | 2 Phospho (ST)                |
| CASA1_BOVIN Alpha-S1-casein OS=Bos taurus GN=CSN1S1 PE=1 SV=2 | VNELSKDIGSESTEDQAMEDIK     | Oxidation (M); 2 Phospho (ST) |
| CASA1_BOVIN Alpha-S1-casein OS=Bos taurus GN=CSN1S1 PE=1 SV=2 | QMEAESISSSEEIVPNSVEQK      | 4 Phospho (ST)                |
| CASA1_BOVIN Alpha-S1-casein OS=Bos taurus GN=CSN1S1 PE=1 SV=2 | QMEAESISSSEEIVPNSVEQK      | Oxidation (M); 4 Phospho (ST) |
| CASA1_BOVIN Alpha-S1-casein OS=Bos taurus GN=CSN1S1 PE=1 SV=2 | VNELSKDIGSESTEDQAMEDIK     | 3 Phospho (ST)                |
| CASA1_BOVIN Alpha-S1-casein OS=Bos taurus GN=CSN1S1 PE=1 SV=2 | VNELSKDIGSESTEDQAMEDIK     | Oxidation (M); 3 Phospho (ST) |
| CASA1_BOVIN Alpha-S1-casein OS=Bos taurus GN=CSN1S1 PE=1 SV=2 | QMEAESISSSEEIVPNSVEQK      | 5 Phospho (ST)                |
| CASA1_BOVIN Alpha-S1-casein OS=Bos taurus GN=CSN1S1 PE=1 SV=2 | VNELSKDIGSESTEDQAMEDIK     | 4 Phospho (ST)                |
| CASA1_BOVIN Alpha-S1-casein OS=Bos taurus GN=CSN1S1 PE=1 SV=2 | EKVNELSKDIGSESTEDQAMEDIK   | 2 Phospho (ST)                |
| CASA1_BOVIN Alpha-S1-casein OS=Bos taurus GN=CSN1S1 PE=1 SV=2 | EKVNELSKDIGSESTEDQAMEDIK   | 3 Phospho (ST)                |
| CASA1_BOVIN Alpha-S1-casein OS=Bos taurus GN=CSN1S1 PE=1 SV=2 | QMEAESISSSEEIVPNSVEQKHIQK  | 5 Phospho (ST)                |
| CASB_BOVIN Beta-casein OS=Bos taurus GN=CSN2 PE=1 SV=2        | FQSEEQQTDELQDK             | Phospho (ST)                  |
| CASB_BOVIN Beta-casein OS=Bos taurus GN=CSN2 PE=1 SV=2        | FQSEEQQTDELQDK             | 2 Phospho (ST)                |
| CASB_BOVIN Beta-casein OS=Bos taurus GN=CSN2 PE=1 SV=2        | IEKFQSEEQQTDELQDK          | Phospho (ST)                  |
| CASB_BOVIN Beta-casein OS=Bos taurus GN=CSN2 PE=1 SV=2        | KIEKFQSEEQQTDELQDK         | Phospho (ST)                  |
| CASB_BOVIN Beta-casein OS=Bos taurus GN=CSN2 PE=1 SV=2        | ELEELNVPGEIVESLSSEESITR    | Phospho (ST)                  |
| CASB_BOVIN Beta-casein OS=Bos taurus GN=CSN2 PE=1 SV=2        | ELEELNVPGEIVESLSSEESITR    | 2 Phospho (ST)                |
| CASB_BOVIN Beta-casein OS=Bos taurus GN=CSN2 PE=1 SV=2        | ELEELNVPGEIVESLSSEESITR    | 3 Phospho (ST)                |
| CASB_BOVIN Beta-casein OS=Bos taurus GN=CSN2 PE=1 SV=2        | ELEELNVPGEIVESLSSEESITR    | 4 Phospho (ST)                |
| CASB_BOVIN Beta-casein OS=Bos taurus GN=CSN2 PE=1 SV=2        | ELEELNVPGEIVESLSSEESITRINK | 4 Phospho (ST)                |
| CASA2_BOVIN Alpha-S2-casein OS=Bos taurus GN=CSN1S2 PE=1 SV=2 | NMAINPSK                   | Phospho (ST)                  |
| CASA2_BOVIN Alpha-S2-casein OS=Bos taurus GN=CSN1S2 PE=1 SV=2 | NMAINPSK                   | Oxidation (M); Phospho (ST)   |
| CASA2_BOVIN Alpha-S2-casein OS=Bos taurus GN=CSN1S2 PE=1 SV=2 | TKLTEEEK                   | Phospho (ST)                  |
| CASA2_BOVIN Alpha-S2-casein OS=Bos taurus GN=CSN1S2 PE=1 SV=2 | EQLSTSEENSK                | Phospho (ST)                  |
| CASA2_BOVIN Alpha-S2-casein OS=Bos taurus GN=CSN1S2 PE=1 SV=2 | EQLSTSEENSK                | 2 Phospho (ST)                |
| CASA2_BOVIN Alpha-S2-casein OS=Bos taurus GN=CSN1S2 PE=1 SV=2 | EQLSTSEENSKK               | Phospho (ST)                  |
| CASA2_BOVIN Alpha-S2-casein OS=Bos taurus GN=CSN1S2 PE=1 SV=2 | TVDMESTEVFTK               | Phospho (ST)                  |
| CASA2_BOVIN Alpha-S2-casein OS=Bos taurus GN=CSN1S2 PE=1 SV=2 | TVDMESTEVFTK               | Oxidation (M); Phospho (ST)   |
| CASA2_BOVIN Alpha-S2-casein OS=Bos taurus GN=CSN1S2 PE=1 SV=2 | EQLSTSEENSK                | 3 Phospho (ST)                |

|                                                               |                             |                               |
|---------------------------------------------------------------|-----------------------------|-------------------------------|
| CASA2_BOVIN Alpha-S2-casein OS=Bos taurus GN=CSN1S2 PE=1 SV=2 | EQLSTSEENSKK                | 2 Phospho (ST)                |
| CASA2_BOVIN Alpha-S2-casein OS=Bos taurus GN=CSN1S2 PE=1 SV=2 | TVDMESTEVFTK                | 2 Phospho (ST)                |
| CASA2_BOVIN Alpha-S2-casein OS=Bos taurus GN=CSN1S2 PE=1 SV=2 | TVDMESTEVFTK                | Oxidation (M); 2 Phospho (ST) |
| CASA2_BOVIN Alpha-S2-casein OS=Bos taurus GN=CSN1S2 PE=1 SV=2 | KTVDMESTEVEFTK              | Phospho (ST)                  |
| CASA2_BOVIN Alpha-S2-casein OS=Bos taurus GN=CSN1S2 PE=1 SV=2 | TVDMESTEVFTKK               | Phospho (ST)                  |
| CASA2_BOVIN Alpha-S2-casein OS=Bos taurus GN=CSN1S2 PE=1 SV=2 | KTVDMESTEVEFTK              | Oxidation (M); Phospho (ST)   |
| CASA2_BOVIN Alpha-S2-casein OS=Bos taurus GN=CSN1S2 PE=1 SV=2 | TVDMESTEVFTKK               | Oxidation (M); Phospho (ST)   |
| CASA2_BOVIN Alpha-S2-casein OS=Bos taurus GN=CSN1S2 PE=1 SV=2 | EQLSTSEENSKK                | 3 Phospho (ST)                |
| CASA2_BOVIN Alpha-S2-casein OS=Bos taurus GN=CSN1S2 PE=1 SV=2 | KTVDMESTEVEFTK              | 2 Phospho (ST)                |
| CASA2_BOVIN Alpha-S2-casein OS=Bos taurus GN=CSN1S2 PE=1 SV=2 | KTVDMESTEVEFTK              | Oxidation (M); 2 Phospho (ST) |
| CASA2_BOVIN Alpha-S2-casein OS=Bos taurus GN=CSN1S2 PE=1 SV=2 | NMAINPSKENLCSTFCK           | Phospho (ST)                  |
| CASA2_BOVIN Alpha-S2-casein OS=Bos taurus GN=CSN1S2 PE=1 SV=2 | NMAINPSKENLCSTFCK           | Oxidation (M); Phospho (ST)   |
| CASA2_BOVIN Alpha-S2-casein OS=Bos taurus GN=CSN1S2 PE=1 SV=2 | NTMEHVSSSEESIISQETYK        | 2 Phospho (ST)                |
| CASA2_BOVIN Alpha-S2-casein OS=Bos taurus GN=CSN1S2 PE=1 SV=2 | NTMEHVSSSEESIISQETYK        | Oxidation (M); 3 Phospho (ST) |
| CASA2_BOVIN Alpha-S2-casein OS=Bos taurus GN=CSN1S2 PE=1 SV=2 | NAVPIPTLNRQLSTSEENSK        | 2 Phospho (ST)                |
| CASA2_BOVIN Alpha-S2-casein OS=Bos taurus GN=CSN1S2 PE=1 SV=2 | NTMEHVSSSEESIISQETYK        | 4 Phospho (ST)                |
| CASA2_BOVIN Alpha-S2-casein OS=Bos taurus GN=CSN1S2 PE=1 SV=2 | NAVPIPTLNRQLSTSEENSK        | 3 Phospho (ST)                |
| CASA2_BOVIN Alpha-S2-casein OS=Bos taurus GN=CSN1S2 PE=1 SV=2 | NTMEHVSSSEESIISQETYK        | 5 Phospho (ST)                |
| CASA2_BOVIN Alpha-S2-casein OS=Bos taurus GN=CSN1S2 PE=1 SV=2 | NANEEYSIGSSSEESAEVATEEVK    | 4 Phospho (ST)                |
| CASA2_BOVIN Alpha-S2-casein OS=Bos taurus GN=CSN1S2 PE=1 SV=2 | NANEEYSIGSSSEESAEVATEEVK    | 6 Phospho (ST)                |
| F1MI46_BOVIN Osteopontin OS=Bos taurus GN=SPP1 PE=1 SV=1      | QNTLPSK                     | Phospho (ST)                  |
| F1MI46_BOVIN Osteopontin OS=Bos taurus GN=SPP1 PE=1 SV=1      | TSQLTDHSK                   | Phospho (ST)                  |
| F1MI46_BOVIN Osteopontin OS=Bos taurus GN=SPP1 PE=1 SV=1      | LDLDHKSEEDK                 | Phospho (ST)                  |
| F1MI46_BOVIN Osteopontin OS=Bos taurus GN=SPP1 PE=1 SV=1      | HSNLIESQENSK                | Phospho (ST)                  |
| F1MI46_BOVIN Osteopontin OS=Bos taurus GN=SPP1 PE=1 SV=1      | ISHELDSASSEVN               | Phospho (ST)                  |
| F1MI46_BOVIN Osteopontin OS=Bos taurus GN=SPP1 PE=1 SV=1      | HSNLIESQENSK                | 2 Phospho (ST)                |
| F1MI46_BOVIN Osteopontin OS=Bos taurus GN=SPP1 PE=1 SV=1      | ISHELDSASSEVN               | 2 Phospho (ST)                |
| F1MI46_BOVIN Osteopontin OS=Bos taurus GN=SPP1 PE=1 SV=1      | ISHELDSASSEVN               | 3 Phospho (ST)                |
| F1MI46_BOVIN Osteopontin OS=Bos taurus GN=SPP1 PE=1 SV=1      | ETNSSELSKELTPK              | Phospho (ST)                  |
| F1MI46_BOVIN Osteopontin OS=Bos taurus GN=SPP1 PE=1 SV=1      | ETNSSELSKELTPK              | 2 Phospho (ST)                |
| F1MI46_BOVIN Osteopontin OS=Bos taurus GN=SPP1 PE=1 SV=1      | IRISHELDSASSEVN             | Phospho (ST)                  |
| F1MI46_BOVIN Osteopontin OS=Bos taurus GN=SPP1 PE=1 SV=1      | NKHSNLIESQENSK              | 2 Phospho (ST)                |
| F1MI46_BOVIN Osteopontin OS=Bos taurus GN=SPP1 PE=1 SV=1      | IRISHELDSASSEVN             | 2 Phospho (ST)                |
| F1MI46_BOVIN Osteopontin OS=Bos taurus GN=SPP1 PE=1 SV=1      | TSQLTDHSKETNSSELSK          | Phospho (ST)                  |
| F1MI46_BOVIN Osteopontin OS=Bos taurus GN=SPP1 PE=1 SV=1      | TSQLTDHSKETNSSELSK          | 2 Phospho (ST)                |
| F1MI46_BOVIN Osteopontin OS=Bos taurus GN=SPP1 PE=1 SV=1      | QTFLAPQNSVSSEETDDNK         | Phospho (ST)                  |
| F1MI46_BOVIN Osteopontin OS=Bos taurus GN=SPP1 PE=1 SV=1      | QTFLAPQNSVSSEETDDNK         | 2 Phospho (ST)                |
| F1MI46_BOVIN Osteopontin OS=Bos taurus GN=SPP1 PE=1 SV=1      | KTSQLTDHSKETNSSELSK         | 2 Phospho (ST)                |
| F1MI46_BOVIN Osteopontin OS=Bos taurus GN=SPP1 PE=1 SV=1      | QTFLAPQNSVSSEETDDNK         | 3 Phospho (ST)                |
| F1MI46_BOVIN Osteopontin OS=Bos taurus GN=SPP1 PE=1 SV=1      | HSNLIESQENSKLSQEFHSLEDK     | Phospho (ST)                  |
| F1MI46_BOVIN Osteopontin OS=Bos taurus GN=SPP1 PE=1 SV=1      | SNVQSPDATEEDFTSHIESEEMHDAPK | Phospho (ST)                  |
| F1MI46_BOVIN Osteopontin OS=Bos taurus GN=SPP1 PE=1 SV=1      | SNVQSPDATEEDFTSHIESEEMHDAPK | 2 Phospho (ST)                |

|                                                                 |                         |                             |
|-----------------------------------------------------------------|-------------------------|-----------------------------|
| OSTK_BOVIN Osteopontin-K OS=Bos taurus PE=2 SV=1                | QNTLPSK                 | Phospho (ST)                |
| OSTK_BOVIN Osteopontin-K OS=Bos taurus PE=2 SV=1                | LDLDHKSEEDK             | Phospho (ST)                |
| OSTK_BOVIN Osteopontin-K OS=Bos taurus PE=2 SV=1                | HSNLIESQENSK            | Phospho (ST)                |
| OSTK_BOVIN Osteopontin-K OS=Bos taurus PE=2 SV=1                | ISHELDSASSEVN           | Phospho (ST)                |
| OSTK_BOVIN Osteopontin-K OS=Bos taurus PE=2 SV=1                | HSNLIESQENSK            | 2 Phospho (ST)              |
| OSTK_BOVIN Osteopontin-K OS=Bos taurus PE=2 SV=1                | ISHELDSASSEVN           | 2 Phospho (ST)              |
| OSTK_BOVIN Osteopontin-K OS=Bos taurus PE=2 SV=1                | ISHELDSASSEVN           | 3 Phospho (ST)              |
| OSTK_BOVIN Osteopontin-K OS=Bos taurus PE=2 SV=1                | IRISHELDSASSEVN         | Phospho (ST)                |
| OSTK_BOVIN Osteopontin-K OS=Bos taurus PE=2 SV=1                | NKHSNLIESQENSK          | 2 Phospho (ST)              |
| OSTK_BOVIN Osteopontin-K OS=Bos taurus PE=2 SV=1                | IRISHELDSASSEVN         | 2 Phospho (ST)              |
| OSTK_BOVIN Osteopontin-K OS=Bos taurus PE=2 SV=1                | QTFLAPQNSVSSEETDDNK     | Phospho (ST)                |
| OSTK_BOVIN Osteopontin-K OS=Bos taurus PE=2 SV=1                | QTFLAPQNSVSSEETDDNK     | 2 Phospho (ST)              |
| OSTK_BOVIN Osteopontin-K OS=Bos taurus PE=2 SV=1                | QTFLAPQNSVSSEETDDNK     | 3 Phospho (ST)              |
| OSTK_BOVIN Osteopontin-K OS=Bos taurus PE=2 SV=1                | HSNLIESQENSKLSQEFHSLEDK | Phospho (ST)                |
| Q58DM6_BOVIN Osteopontin OS=Bos taurus GN=SPP1 PE=2 SV=1        | QNTLPSK                 | Phospho (ST)                |
| Q58DM6_BOVIN Osteopontin OS=Bos taurus GN=SPP1 PE=2 SV=1        | QTFLAPQNSVSSEETDDNK     | Phospho (ST)                |
| Q58DM6_BOVIN Osteopontin OS=Bos taurus GN=SPP1 PE=2 SV=1        | QTFLAPQNSVSSEETDDNK     | 2 Phospho (ST)              |
| Q58DM6_BOVIN Osteopontin OS=Bos taurus GN=SPP1 PE=2 SV=1        | QTFLAPQNSVSSEETDDNK     | 3 Phospho (ST)              |
| B6V315_BOVIN Alpha-lactalbumin OS=Bos taurus GN=LALBA PE=1 SV=1 | DDQNPQHSSNICNISCDK      | Phospho (ST)                |
| PERL_BOVIN Lactoperoxidase OS=Bos taurus GN=LPO PE=1 SV=1       | TTLSEAPTQQQLSEYFK       | Phospho (ST)                |
| A5PJE3_BOVIN Fibrinogen alpha chain OS=Bos taurus GN=FGA PE=1 S | MEDEAESLEDLGFK          | Phospho (ST)                |
| F1MDT6_BOVIN Glycerol-3-phosphate acyltransferase 1, mitochondr | SDEEDEDSDFGEEQR         | Phospho (ST)                |
| F6PZ29_BOVIN Uncharacterized protein OS=Bos taurus GN=MCFD2 PE= | EEGSEQAPMNEDELINLIDGVLR | Phospho (ST)                |
| F6PZ29_BOVIN Uncharacterized protein OS=Bos taurus GN=MCFD2 PE= | EEGSEQAPMNEDELINLIDGVLR | Oxidation (M); Phospho (ST) |
| B0JYN6_BOVIN Alpha-2-HS-glycoprotein OS=Bos taurus GN=AHSG PE=1 | CDSSPDSAEDVR            | Phospho (ST)                |
| GLCM1_BOVIN Glycosylation-dependent cell adhesion molecule 1 OS | EPSISR                  | Phospho (ST)                |
| GLCM1_BOVIN Glycosylation-dependent cell adhesion molecule 1 OS | EDLISK                  | Phospho (ST)                |
| GLCM1_BOVIN Glycosylation-dependent cell adhesion molecule 1 OS | NLQISNEDLSK             | Phospho (ST)                |
| GLCM1_BOVIN Glycosylation-dependent cell adhesion molecule 1 OS | NLQISNEDLSK             | 2 Phospho (ST)              |
| GLCM1_BOVIN Glycosylation-dependent cell adhesion molecule 1 OS | EPSISREDLISK            | Phospho (ST)                |
| GLCM1_BOVIN Glycosylation-dependent cell adhesion molecule 1 OS | EDLISKEQIVIR            | Phospho (ST)                |
| GLCM1_BOVIN Glycosylation-dependent cell adhesion molecule 1 OS | EPSISREDLISK            | 2 Phospho (ST)              |
| GLCM1_BOVIN Glycosylation-dependent cell adhesion molecule 1 OS | EPSISREDLISK            | 3 Phospho (ST)              |
| GLCM1_BOVIN Glycosylation-dependent cell adhesion molecule 1 OS | NLQISNEDLSKEPSISR       | Phospho (ST)                |
| GLCM1_BOVIN Glycosylation-dependent cell adhesion molecule 1 OS | NLQISNEDLSKEPSISR       | 2 Phospho (ST)              |
| GLCM1_BOVIN Glycosylation-dependent cell adhesion molecule 1 OS | NLQISNEDLSKEPSISR       | 3 Phospho (ST)              |
| GLCM1_BOVIN Glycosylation-dependent cell adhesion molecule 1 OS | NLQISNEDLSKEPSISR       | 4 Phospho (ST)              |
| GLCM1_BOVIN Glycosylation-dependent cell adhesion molecule 1 OS | NLQISNEDLSKEPSISREDLISK | Phospho (ST)                |
| GLCM1_BOVIN Glycosylation-dependent cell adhesion molecule 1 OS | NLQISNEDLSKEPSISREDLISK | 3 Phospho (ST)              |
| GLCM1_BOVIN Glycosylation-dependent cell adhesion molecule 1 OS | NLQISNEDLSKEPSISREDLISK | 4 Phospho (ST)              |
| GLCM1_BOVIN Glycosylation-dependent cell adhesion molecule 1 OS | NLQISNEDLSKEPSISREDLISK | 5 Phospho (ST)              |
| E1BHI7_BOVIN Butyrophilin subfamily 1 member A1 OS=Bos taurus G | VSPAVFVSR               | Phospho (ST)                |

|                                                                 |                              |                               |
|-----------------------------------------------------------------|------------------------------|-------------------------------|
| F1MXX6_BOVIN Lactadherin OS=Bos taurus GN=MFGE8 PE=1 SV=1       | AGSAEYLK                     | Phospho (ST)                  |
| C6KEF7_BOVIN Growth/differentiation factor 8 OS=Bos taurus GN=M | DASSDGSLEDDDYHAR             | Phospho (ST)                  |
| F1MRM8_BOVIN G-protein-coupled receptor family C group 5 member | ATANSQVTGSANSTLR             | 2 Phospho (ST)                |
| F1MHI1_BOVIN Perilipin OS=Bos taurus GN=PLIN2 PE=3 SV=1         | LGSLSTK                      | Phospho (ST)                  |
| Q3SX32_BOVIN Perilipin OS=Bos taurus GN=M6PRBP1 PE=2 SV=1       | LGLSER                       | Phospho (ST)                  |
| E1BPQ9_BOVIN Uncharacterized protein OS=Bos taurus GN=IGSF5 PE= | SANENYGYHSDESR               | Phospho (ST)                  |
| F1MX65_BOVIN Protein OS-9 OS=Bos taurus GN=OS9 PE=1 SV=1        | KPPSPQSTEEDPEHR              | Phospho (ST)                  |
| CASA1_BOVIN Alpha-S1-casein OS=Bos taurus GN=CSN1S1 PE=1 SV=2   | EKVNELSK                     | Phospho (ST)                  |
| CASA1_BOVIN Alpha-S1-casein OS=Bos taurus GN=CSN1S1 PE=1 SV=2   | KYKVPQLEIVPNSAEER            | Phospho (ST)                  |
| CASA1_BOVIN Alpha-S1-casein OS=Bos taurus GN=CSN1S1 PE=1 SV=2   | QMEAESISSSEEIVPNSVEQK        | Oxidation (M); 5 Phospho (ST) |
| CASA1_BOVIN Alpha-S1-casein OS=Bos taurus GN=CSN1S1 PE=1 SV=2   | EKVNELSKDIGESTEDQAMEDIK      | Oxidation (M); 3 Phospho (ST) |
| CASA2_BOVIN Alpha-S2-casein OS=Bos taurus GN=CSN1S2 PE=1 SV=2   | NAVPIPTLNR                   | Phospho (ST)                  |
| CASA2_BOVIN Alpha-S2-casein OS=Bos taurus GN=CSN1S2 PE=1 SV=2   | NTMEHVSSEESIISQETYK          | Phospho (ST)                  |
| CASA2_BOVIN Alpha-S2-casein OS=Bos taurus GN=CSN1S2 PE=1 SV=2   | NANEEEYSIGSSSEESAEVATEEVK    | 4 Phospho (ST); Phospho (Y)   |
| F1MI46_BOVIN Osteopontin OS=Bos taurus GN=SPP1 PE=1 SV=1        | IRISHELDSASSEVN              | 3 Phospho (ST)                |
| F1MI46_BOVIN Osteopontin OS=Bos taurus GN=SPP1 PE=1 SV=1        | SNVQSPDATEEDFTSHIESEEMHDAPK  | Oxidation (M); 2 Phospho (ST) |
| F1MI46_BOVIN Osteopontin OS=Bos taurus GN=SPP1 PE=1 SV=1        | RSNVQSPDATEEDFTSHIESEEMHDAPK | 2 Phospho (ST)                |
| F1MI46_BOVIN Osteopontin OS=Bos taurus GN=SPP1 PE=1 SV=1        | RSNVQSPDATEEDFTSHIESEEMHDAPK | 3 Phospho (ST)                |
| OSTK_BOVIN Osteopontin-K OS=Bos taurus PE=2 SV=1                | IRISHELDSASSEVN              | 3 Phospho (ST)                |
| TRY1_BOVIN Cationic trypsin OS=Bos taurus PE=1 SV=3             | SSGTSYPDVVK                  | Phospho (Y)                   |
| F1MVT9_BOVIN Uncharacterized protein OS=Bos taurus GN=SPOCK1 PE | VINPTSSETAQGR                | Phospho (ST)                  |
| SEP15_BOVIN 15 kDa selenoprotein OS=Bos taurus GN=SEP15 PE=2 SV | WNTDSVEEFLSEK                | Phospho (ST)                  |
| NUCB1_BOVIN Nucleobindin-1 OS=Bos taurus GN=NUCB1 PE=2 SV=1     | LSQETEALGR                   | Phospho (ST)                  |
| NUCB1_BOVIN Nucleobindin-1 OS=Bos taurus GN=NUCB1 PE=2 SV=1     | AQRLSQETEALGR                | Phospho (ST)                  |
| B0JYN6_BOVIN Alpha-2-HS-glycoprotein OS=Bos taurus GN=AHSG PE=1 | CDSSPDSAEDVRK                | Phospho (ST)                  |
| SIL1_BOVIN Nucleotide exchange factor SIL1 OS=Bos taurus GN=SIL | KETEELEPK                    | Phospho (ST)                  |
| SIL1_BOVIN Nucleotide exchange factor SIL1 OS=Bos taurus GN=SIL | EGAEMENSKEDQER               | Phospho (ST)                  |
| SIL1_BOVIN Nucleotide exchange factor SIL1 OS=Bos taurus GN=SIL | EGAEMENSKEDQER               | Oxidation (M); Phospho (ST)   |
| PIGR_BOVIN Polymeric immunoglobulin receptor OS=Bos taurus GN=P | SPIFGPEEVTSVEGR              | Phospho (ST)                  |
| F1MHI1_BOVIN Perilipin OS=Bos taurus GN=PLIN2 PE=3 SV=1         | KDQYPYLK                     | Phospho (Y)                   |
| A0A140T8A9_BOVIN Kappa-casein OS=Bos taurus GN=CSN3 PE=1 SV=1   | SCQAQPTTMAR                  | Oxidation (M); Phospho (ST)   |
| HS90A_BOVIN Heat shock protein HSP 90-alpha OS=Bos taurus GN=HS | ESDDKPEIEDVGSDEEEEEKK        | Phospho (ST)                  |
| A0A140T8C8_BOVIN Kininogen-1 OS=Bos taurus GN=KNG1 PE=1 SV=1    | ETTCSKGSNEELTK               | Phospho (ST)                  |
| RAN_BOVIN GTP-binding nuclear protein Ran OS=Bos taurus GN=RAN  | LVLVGDGGTGK                  | Phospho (ST)                  |
| B5UBG1_BOVIN Calcitonin OS=Bos taurus GN=CT PE=2 SV=1           | DVANSLER                     | Phospho (ST)                  |
| F1N5I2_BOVIN Uncharacterized protein OS=Bos taurus GN=DLGAP4 PE | AMGDEDSDESGGSPKPSPK          | Phospho (ST)                  |
| F1N5I2_BOVIN Uncharacterized protein OS=Bos taurus GN=DLGAP4 PE | AMGDEDSDESGGSPKPSPK          | 2 Phospho (ST)                |
| E1BF27_BOVIN Uncharacterized protein OS=Bos taurus GN=SLC38A10  | MPGSPEQHGAGDVPQSR            | Phospho (ST)                  |
| B4GT1_BOVIN Beta-1,4-galactosyltransferase 1 OS=Bos taurus GN=B | LPQLVGVHPLQGSSSHGAAAIGQPSGEL | Phospho (ST)                  |
| CASA1_BOVIN Alpha-S1-casein OS=Bos taurus GN=CSN1S1 PE=1 SV=2   | DIGESTEDQAMEDIK              | Oxidation (M); 3 Phospho (ST) |
| CASB_BOVIN Beta-casein OS=Bos taurus GN=CSN2 PE=1 SV=2          | ELEELNVPGEIVESLSSEESITR      | 5 Phospho (ST)                |
| TRY1_BOVIN Cationic trypsin OS=Bos taurus PE=1 SV=3             | APILSDSSCK                   | Phospho (ST)                  |

|                                                                 |                              |                               |
|-----------------------------------------------------------------|------------------------------|-------------------------------|
| CASA2_BOVIN Alpha-S2-casein OS=Bos taurus GN=CSN1S2 PE=1 SV=2   | ENLCSTFCK                    | Phospho (ST)                  |
| CASA2_BOVIN Alpha-S2-casein OS=Bos taurus GN=CSN1S2 PE=1 SV=2   | NMAINPSKENLCSTFCK            | 2 Phospho (ST)                |
| CASA2_BOVIN Alpha-S2-casein OS=Bos taurus GN=CSN1S2 PE=1 SV=2   | NTMEHVSSEESIISQETYK          | 3 Phospho (ST)                |
| CASA2_BOVIN Alpha-S2-casein OS=Bos taurus GN=CSN1S2 PE=1 SV=2   | NTMEHVSSEESIISQETYK          | 3 Phospho (ST); Phospho (Y)   |
| CASA2_BOVIN Alpha-S2-casein OS=Bos taurus GN=CSN1S2 PE=1 SV=2   | NTMEHVSSEESIISQETYK          | Oxidation (M); 4 Phospho (ST) |
| CASA2_BOVIN Alpha-S2-casein OS=Bos taurus GN=CSN1S2 PE=1 SV=2   | NANEEEEYSIGSSSEESAEEVATEEVK  | 3 Phospho (ST)                |
| CASA2_BOVIN Alpha-S2-casein OS=Bos taurus GN=CSN1S2 PE=1 SV=2   | NANEEEEYSIGSSSEESAEEVATEEVK  | 5 Phospho (ST)                |
| F1MI46_BOVIN Osteopontin OS=Bos taurus GN=SPP1 PE=1 SV=1        | KTSQLTDHSK                   | Phospho (ST)                  |
| F1MI46_BOVIN Osteopontin OS=Bos taurus GN=SPP1 PE=1 SV=1        | LSQEFHSLEDK                  | Phospho (ST)                  |
| OSTK_BOVIN Osteopontin-K OS=Bos taurus PE=2 SV=1                | LSQEFHSLEDK                  | Phospho (ST)                  |
| BT1A1_BOVIN Butyrophilin subfamily 1 member A1 OS=Bos taurus GN | VSPAVFVSR                    | Phospho (ST)                  |
| BT1A1_BOVIN Butyrophilin subfamily 1 member A1 OS=Bos taurus GN | EIPLSPMGEDSASGDIETLHSK       | 2 Phospho (ST)                |
| GLCM1_BOVIN Glycosylation-dependent cell adhesion molecule 1 OS | NATLGSEETTEHTPSDASTTEGK      | Phospho (ST)                  |
| CO3_BOVIN Complement C3 OS=Bos taurus GN=C3 PE=1 SV=2           | EEVPAADLSDQVPDTESETK         | Phospho (ST)                  |
| F1MMF7_BOVIN Uncharacterized protein OS=Bos taurus GN=C17orf80  | MLKDTKPKVASR                 | Phospho (ST)                  |
| F1MJQ4_BOVIN Uncharacterized protein OS=Bos taurus GN=P4HA2 PE= | GQEFLRPCGSTVEVD              | Phospho (ST)                  |
| F1MNT4_BOVIN Uncharacterized protein OS=Bos taurus GN=LAMB1 PE= | NFLTQDSADLDSIEAVANEVLK       | 2 Phospho (ST)                |
| F1N2Y2_BOVIN Uncharacterized protein OS=Bos taurus GN=COL5A2 PE | GPVGSSEPKGGQGDPRPGEPGLPGAR   | 2 Phospho (ST)                |
| E1BIT6_BOVIN Uncharacterized protein OS=Bos taurus GN=ALOXE3 PE | MALYRVRVTTGPYLMAGTLDNIFVTLVG | Oxidation (M); 4 Phospho (ST) |



Table S2. Detail information of phosphoproteins and phosphopeptides enriched from tryptic digest of milk using commercial TiO<sub>2</sub>.

| Phosphoprotein                                                | Phosphopeptide             | Modification                  |
|---------------------------------------------------------------|----------------------------|-------------------------------|
| CASA1_BOVIN Alpha-S1-casein OS=Bos taurus GN=CSN1S1 PE=1 SV=2 | VNELSK                     | Phospho (ST)                  |
| CASA1_BOVIN Alpha-S1-casein OS=Bos taurus GN=CSN1S1 PE=1 SV=2 | YLGYLEQLLR                 | Phospho (Y)                   |
| CASA1_BOVIN Alpha-S1-casein OS=Bos taurus GN=CSN1S1 PE=1 SV=2 | VPQLEIVPNSAEER             | Phospho (ST)                  |
| CASA1_BOVIN Alpha-S1-casein OS=Bos taurus GN=CSN1S1 PE=1 SV=2 | DIGSESTEDQAMEDIK           | Phospho (ST)                  |
| CASA1_BOVIN Alpha-S1-casein OS=Bos taurus GN=CSN1S1 PE=1 SV=2 | DIGSESTEDQAMEDIK           | Oxidation (M); Phospho (ST)   |
| CASA1_BOVIN Alpha-S1-casein OS=Bos taurus GN=CSN1S1 PE=1 SV=2 | DIGSESTEDQAMEDIK           | 2 Phospho (ST)                |
| CASA1_BOVIN Alpha-S1-casein OS=Bos taurus GN=CSN1S1 PE=1 SV=2 | DIGSESTEDQAMEDIK           | Oxidation (M); 2 Phospho (ST) |
| CASA1_BOVIN Alpha-S1-casein OS=Bos taurus GN=CSN1S1 PE=1 SV=2 | YKVPQLEIVPNSAEER           | Phospho (ST)                  |
| CASA1_BOVIN Alpha-S1-casein OS=Bos taurus GN=CSN1S1 PE=1 SV=2 | DIGSESTEDQAMEDIK           | 3 Phospho (ST)                |
| CASA1_BOVIN Alpha-S1-casein OS=Bos taurus GN=CSN1S1 PE=1 SV=2 | YKVPQLEIVPNSAEER           | Phospho (ST); Phospho (Y)     |
| CASA1_BOVIN Alpha-S1-casein OS=Bos taurus GN=CSN1S1 PE=1 SV=2 | VNELSKDIGSESTEDQAMEDIK     | 2 Phospho (ST)                |
| CASA1_BOVIN Alpha-S1-casein OS=Bos taurus GN=CSN1S1 PE=1 SV=2 | VNELSKDIGSESTEDQAMEDIK     | Oxidation (M); 2 Phospho (ST) |
| CASA1_BOVIN Alpha-S1-casein OS=Bos taurus GN=CSN1S1 PE=1 SV=2 | QMEAESISSSEEIVPNSVEQK      | 4 Phospho (ST)                |
| CASA1_BOVIN Alpha-S1-casein OS=Bos taurus GN=CSN1S1 PE=1 SV=2 | QMEAESISSSEEIVPNSVEQK      | Oxidation (M); 4 Phospho (ST) |
| CASA1_BOVIN Alpha-S1-casein OS=Bos taurus GN=CSN1S1 PE=1 SV=2 | VNELSKDIGSESTEDQAMEDIK     | 3 Phospho (ST)                |
| CASA1_BOVIN Alpha-S1-casein OS=Bos taurus GN=CSN1S1 PE=1 SV=2 | VNELSKDIGSESTEDQAMEDIK     | Oxidation (M); 3 Phospho (ST) |
| CASA1_BOVIN Alpha-S1-casein OS=Bos taurus GN=CSN1S1 PE=1 SV=2 | QMEAESISSSEEIVPNSVEQK      | 5 Phospho (ST)                |
| CASA1_BOVIN Alpha-S1-casein OS=Bos taurus GN=CSN1S1 PE=1 SV=2 | VNELSKDIGSESTEDQAMEDIK     | 4 Phospho (ST)                |
| CASA1_BOVIN Alpha-S1-casein OS=Bos taurus GN=CSN1S1 PE=1 SV=2 | EKVNELSKDIGSESTEDQAMEDIK   | 2 Phospho (ST)                |
| CASA1_BOVIN Alpha-S1-casein OS=Bos taurus GN=CSN1S1 PE=1 SV=2 | EKVNELSKDIGSESTEDQAMEDIK   | 3 Phospho (ST)                |
| CASA1_BOVIN Alpha-S1-casein OS=Bos taurus GN=CSN1S1 PE=1 SV=2 | QMEAESISSSEEIVPNSVEQKHIQK  | 5 Phospho (ST)                |
| CASB_BOVIN Beta-casein OS=Bos taurus GN=CSN2 PE=1 SV=2        | FQSEEQQTDELDQK             | Phospho (ST)                  |
| CASB_BOVIN Beta-casein OS=Bos taurus GN=CSN2 PE=1 SV=2        | FQSEEQQTDELDQK             | 2 Phospho (ST)                |
| CASB_BOVIN Beta-casein OS=Bos taurus GN=CSN2 PE=1 SV=2        | IEKFQSEEQQTDELDQK          | Phospho (ST)                  |
| CASB_BOVIN Beta-casein OS=Bos taurus GN=CSN2 PE=1 SV=2        | KIEKFQSEEQQTDELDQK         | Phospho (ST)                  |
| CASB_BOVIN Beta-casein OS=Bos taurus GN=CSN2 PE=1 SV=2        | ELEELNVPGEIVESLSSEESITR    | Phospho (ST)                  |
| CASB_BOVIN Beta-casein OS=Bos taurus GN=CSN2 PE=1 SV=2        | ELEELNVPGEIVESLSSEESITR    | 2 Phospho (ST)                |
| CASB_BOVIN Beta-casein OS=Bos taurus GN=CSN2 PE=1 SV=2        | ELEELNVPGEIVESLSSEESITR    | 3 Phospho (ST)                |
| CASB_BOVIN Beta-casein OS=Bos taurus GN=CSN2 PE=1 SV=2        | ELEELNVPGEIVESLSSEESITR    | 4 Phospho (ST)                |
| CASB_BOVIN Beta-casein OS=Bos taurus GN=CSN2 PE=1 SV=2        | ELEELNVPGEIVESLSSEESITRINK | 4 Phospho (ST)                |
| CASA2_BOVIN Alpha-S2-casein OS=Bos taurus GN=CSN1S2 PE=1 SV=2 | NMAINPSK                   | Phospho (ST)                  |
| CASA2_BOVIN Alpha-S2-casein OS=Bos taurus GN=CSN1S2 PE=1 SV=2 | NMAINPSK                   | Oxidation (M); Phospho (ST)   |
| CASA2_BOVIN Alpha-S2-casein OS=Bos taurus GN=CSN1S2 PE=1 SV=2 | TKLTEEEK                   | Phospho (ST)                  |
| CASA2_BOVIN Alpha-S2-casein OS=Bos taurus GN=CSN1S2 PE=1 SV=2 | EQLSTSEENSK                | Phospho (ST)                  |
| CASA2_BOVIN Alpha-S2-casein OS=Bos taurus GN=CSN1S2 PE=1 SV=2 | EQLSTSEENSK                | 2 Phospho (ST)                |
| CASA2_BOVIN Alpha-S2-casein OS=Bos taurus GN=CSN1S2 PE=1 SV=2 | EQLSTSEENSKK               | Phospho (ST)                  |
| CASA2_BOVIN Alpha-S2-casein OS=Bos taurus GN=CSN1S2 PE=1 SV=2 | TVDMESTEVFTK               | Phospho (ST)                  |
| CASA2_BOVIN Alpha-S2-casein OS=Bos taurus GN=CSN1S2 PE=1 SV=2 | TVDMESTEVFTK               | Oxidation (M); Phospho (ST)   |

|                                                               |                             |                               |
|---------------------------------------------------------------|-----------------------------|-------------------------------|
| CASA2_BOVIN Alpha-S2-casein OS=Bos taurus GN=CSN1S2 PE=1 SV=2 | EQLSTSEENSK                 | 3 Phospho (ST)                |
| CASA2_BOVIN Alpha-S2-casein OS=Bos taurus GN=CSN1S2 PE=1 SV=2 | EQLSTSEENSKK                | 2 Phospho (ST)                |
| CASA2_BOVIN Alpha-S2-casein OS=Bos taurus GN=CSN1S2 PE=1 SV=2 | TVDMESTEVFTK                | 2 Phospho (ST)                |
| CASA2_BOVIN Alpha-S2-casein OS=Bos taurus GN=CSN1S2 PE=1 SV=2 | TVDMESTEVFTK                | Oxidation (M); 2 Phospho (ST) |
| CASA2_BOVIN Alpha-S2-casein OS=Bos taurus GN=CSN1S2 PE=1 SV=2 | KTVDMESTEVEFTK              | Phospho (ST)                  |
| CASA2_BOVIN Alpha-S2-casein OS=Bos taurus GN=CSN1S2 PE=1 SV=2 | TVDMESTEVFTKK               | Phospho (ST)                  |
| CASA2_BOVIN Alpha-S2-casein OS=Bos taurus GN=CSN1S2 PE=1 SV=2 | KTVDMESTEVEFTK              | Oxidation (M); Phospho (ST)   |
| CASA2_BOVIN Alpha-S2-casein OS=Bos taurus GN=CSN1S2 PE=1 SV=2 | TVDMESTEVFTKK               | Oxidation (M); Phospho (ST)   |
| CASA2_BOVIN Alpha-S2-casein OS=Bos taurus GN=CSN1S2 PE=1 SV=2 | EQLSTSEENSKK                | 3 Phospho (ST)                |
| CASA2_BOVIN Alpha-S2-casein OS=Bos taurus GN=CSN1S2 PE=1 SV=2 | KTVDMESTEVEFTK              | 2 Phospho (ST)                |
| CASA2_BOVIN Alpha-S2-casein OS=Bos taurus GN=CSN1S2 PE=1 SV=2 | KTVDMESTEVEFTK              | Oxidation (M); 2 Phospho (ST) |
| CASA2_BOVIN Alpha-S2-casein OS=Bos taurus GN=CSN1S2 PE=1 SV=2 | NMAINPSKENLCSTFCK           | Phospho (ST)                  |
| CASA2_BOVIN Alpha-S2-casein OS=Bos taurus GN=CSN1S2 PE=1 SV=2 | NMAINPSKENLCSTFCK           | Oxidation (M); Phospho (ST)   |
| CASA2_BOVIN Alpha-S2-casein OS=Bos taurus GN=CSN1S2 PE=1 SV=2 | NTMEHVSSSEESIISQETYK        | 2 Phospho (ST)                |
| CASA2_BOVIN Alpha-S2-casein OS=Bos taurus GN=CSN1S2 PE=1 SV=2 | NTMEHVSSSEESIISQETYK        | Oxidation (M); 3 Phospho (ST) |
| CASA2_BOVIN Alpha-S2-casein OS=Bos taurus GN=CSN1S2 PE=1 SV=2 | NAVPIPTLNREQLSTSEENSK       | 2 Phospho (ST)                |
| CASA2_BOVIN Alpha-S2-casein OS=Bos taurus GN=CSN1S2 PE=1 SV=2 | NTMEHVSSSEESIISQETYK        | 4 Phospho (ST)                |
| CASA2_BOVIN Alpha-S2-casein OS=Bos taurus GN=CSN1S2 PE=1 SV=2 | NAVPIPTLNREQLSTSEENSK       | 3 Phospho (ST)                |
| CASA2_BOVIN Alpha-S2-casein OS=Bos taurus GN=CSN1S2 PE=1 SV=2 | NTMEHVSSSEESIISQETYK        | 5 Phospho (ST)                |
| CASA2_BOVIN Alpha-S2-casein OS=Bos taurus GN=CSN1S2 PE=1 SV=2 | NANEEYSIGSSSEESAEVATEEVK    | 4 Phospho (ST)                |
| CASA2_BOVIN Alpha-S2-casein OS=Bos taurus GN=CSN1S2 PE=1 SV=2 | NANEEYSIGSSSEESAEVATEEVK    | 6 Phospho (ST)                |
| F1MI46_BOVIN Osteopontin OS=Bos taurus GN=SPP1 PE=1 SV=1      | QNTLPSK                     | Phospho (ST)                  |
| F1MI46_BOVIN Osteopontin OS=Bos taurus GN=SPP1 PE=1 SV=1      | TSQLTDHSHK                  | Phospho (ST)                  |
| F1MI46_BOVIN Osteopontin OS=Bos taurus GN=SPP1 PE=1 SV=1      | LDLDHKSEEDK                 | Phospho (ST)                  |
| F1MI46_BOVIN Osteopontin OS=Bos taurus GN=SPP1 PE=1 SV=1      | HSNLIQSQENSK                | Phospho (ST)                  |
| F1MI46_BOVIN Osteopontin OS=Bos taurus GN=SPP1 PE=1 SV=1      | ISHELDSASSEVN               | Phospho (ST)                  |
| F1MI46_BOVIN Osteopontin OS=Bos taurus GN=SPP1 PE=1 SV=1      | HSNLIQSQENSK                | 2 Phospho (ST)                |
| F1MI46_BOVIN Osteopontin OS=Bos taurus GN=SPP1 PE=1 SV=1      | ISHELDSASSEVN               | 2 Phospho (ST)                |
| F1MI46_BOVIN Osteopontin OS=Bos taurus GN=SPP1 PE=1 SV=1      | ISHELDSASSEVN               | 3 Phospho (ST)                |
| F1MI46_BOVIN Osteopontin OS=Bos taurus GN=SPP1 PE=1 SV=1      | ETNSSELSKELTPK              | Phospho (ST)                  |
| F1MI46_BOVIN Osteopontin OS=Bos taurus GN=SPP1 PE=1 SV=1      | ETNSSELSKELTPK              | 2 Phospho (ST)                |
| F1MI46_BOVIN Osteopontin OS=Bos taurus GN=SPP1 PE=1 SV=1      | IRISHELDSASSEVN             | Phospho (ST)                  |
| F1MI46_BOVIN Osteopontin OS=Bos taurus GN=SPP1 PE=1 SV=1      | NKHSNLIQSQENSK              | 2 Phospho (ST)                |
| F1MI46_BOVIN Osteopontin OS=Bos taurus GN=SPP1 PE=1 SV=1      | IRISHELDSASSEVN             | 2 Phospho (ST)                |
| F1MI46_BOVIN Osteopontin OS=Bos taurus GN=SPP1 PE=1 SV=1      | TSQLTDHSHKETNSSELSK         | Phospho (ST)                  |
| F1MI46_BOVIN Osteopontin OS=Bos taurus GN=SPP1 PE=1 SV=1      | TSQLTDHSHKETNSSELSK         | 2 Phospho (ST)                |
| F1MI46_BOVIN Osteopontin OS=Bos taurus GN=SPP1 PE=1 SV=1      | QTFLAPQNSVSSEETDDNK         | Phospho (ST)                  |
| F1MI46_BOVIN Osteopontin OS=Bos taurus GN=SPP1 PE=1 SV=1      | QTFLAPQNSVSSEETDDNK         | 2 Phospho (ST)                |
| F1MI46_BOVIN Osteopontin OS=Bos taurus GN=SPP1 PE=1 SV=1      | KTSQLTDHSHKETNSSELSK        | 2 Phospho (ST)                |
| F1MI46_BOVIN Osteopontin OS=Bos taurus GN=SPP1 PE=1 SV=1      | QTFLAPQNSVSSEETDDNK         | 3 Phospho (ST)                |
| F1MI46_BOVIN Osteopontin OS=Bos taurus GN=SPP1 PE=1 SV=1      | HSNLIQSQENSKLSQEFHSLLEDK    | Phospho (ST)                  |
| F1MI46_BOVIN Osteopontin OS=Bos taurus GN=SPP1 PE=1 SV=1      | SNVQSPDATEEDFTSHIESEEMHDAPK | Phospho (ST)                  |

|                                                                 |                             |                             |
|-----------------------------------------------------------------|-----------------------------|-----------------------------|
| F1MI46_BOVIN Osteopontin OS=Bos taurus GN=SPP1 PE=1 SV=1        | SNVQSPDATEEDFTSHIESEEMHDAPK | 2 Phospho (ST)              |
| OSTK_BOVIN Osteopontin-K OS=Bos taurus PE=2 SV=1                | QNTLPSK                     | Phospho (ST)                |
| OSTK_BOVIN Osteopontin-K OS=Bos taurus PE=2 SV=1                | LDLDHKSEEDK                 | Phospho (ST)                |
| OSTK_BOVIN Osteopontin-K OS=Bos taurus PE=2 SV=1                | HSNLIESQENSK                | Phospho (ST)                |
| OSTK_BOVIN Osteopontin-K OS=Bos taurus PE=2 SV=1                | ISHELDSASSEVN               | Phospho (ST)                |
| OSTK_BOVIN Osteopontin-K OS=Bos taurus PE=2 SV=1                | HSNLIESQENSK                | 2 Phospho (ST)              |
| OSTK_BOVIN Osteopontin-K OS=Bos taurus PE=2 SV=1                | ISHELDSASSEVN               | 2 Phospho (ST)              |
| OSTK_BOVIN Osteopontin-K OS=Bos taurus PE=2 SV=1                | ISHELDSASSEVN               | 3 Phospho (ST)              |
| OSTK_BOVIN Osteopontin-K OS=Bos taurus PE=2 SV=1                | IRISHELDSASSEVN             | Phospho (ST)                |
| OSTK_BOVIN Osteopontin-K OS=Bos taurus PE=2 SV=1                | NKHSNLIESQENSK              | 2 Phospho (ST)              |
| OSTK_BOVIN Osteopontin-K OS=Bos taurus PE=2 SV=1                | IRISHELDSASSEVN             | 2 Phospho (ST)              |
| OSTK_BOVIN Osteopontin-K OS=Bos taurus PE=2 SV=1                | QTFLAPQNSVSSEETDDNK         | Phospho (ST)                |
| OSTK_BOVIN Osteopontin-K OS=Bos taurus PE=2 SV=1                | QTFLAPQNSVSSEETDDNK         | 2 Phospho (ST)              |
| OSTK_BOVIN Osteopontin-K OS=Bos taurus PE=2 SV=1                | QTFLAPQNSVSSEETDDNK         | 3 Phospho (ST)              |
| OSTK_BOVIN Osteopontin-K OS=Bos taurus PE=2 SV=1                | HSNLIESQENSKLSQEFHSLEDK     | Phospho (ST)                |
| Q58DM6_BOVIN Osteopontin OS=Bos taurus GN=SPP1 PE=2 SV=1        | QNTLPSK                     | Phospho (ST)                |
| Q58DM6_BOVIN Osteopontin OS=Bos taurus GN=SPP1 PE=2 SV=1        | QTFLAPQNSVSSEETDDNK         | Phospho (ST)                |
| Q58DM6_BOVIN Osteopontin OS=Bos taurus GN=SPP1 PE=2 SV=1        | QTFLAPQNSVSSEETDDNK         | 2 Phospho (ST)              |
| Q58DM6_BOVIN Osteopontin OS=Bos taurus GN=SPP1 PE=2 SV=1        | QTFLAPQNSVSSEETDDNK         | 3 Phospho (ST)              |
| B6V3I5_BOVIN Alpha-lactalbumin OS=Bos taurus GN=LALBA PE=1 SV=1 | DDQNPHSSNICNISCDK           | Phospho (ST)                |
| PERL_BOVIN Lactoperoxidase OS=Bos taurus GN=LPO PE=1 SV=1       | TTLSEAPTTQQLSEYFK           | Phospho (ST)                |
| A5PJE3_BOVIN Fibrinogen alpha chain OS=Bos taurus GN=FGA PE=1 S | MEDEAESLEDLGFK              | Phospho (ST)                |
| F1MDT6_BOVIN Glycerol-3-phosphate acyltransferase 1, mitochondr | SDEEDEDSDFGEEQR             | Phospho (ST)                |
| F6PZ29_BOVIN Uncharacterized protein OS=Bos taurus GN=MCFD2 PE= | EEGSEQAPMNEDELINLIDGVLR     | Phospho (ST)                |
| F6PZ29_BOVIN Uncharacterized protein OS=Bos taurus GN=MCFD2 PE= | EEGSEQAPMNEDELINLIDGVLR     | Oxidation (M); Phospho (ST) |
| BOJYN6_BOVIN Alpha-2-HS-glycoprotein OS=Bos taurus GN=AHSG PE=1 | CDSSPDSAEDVR                | Phospho (ST)                |
| GLCM1_BOVIN Glycosylation-dependent cell adhesion molecule 1 OS | EPSISR                      | Phospho (ST)                |
| GLCM1_BOVIN Glycosylation-dependent cell adhesion molecule 1 OS | EDLISK                      | Phospho (ST)                |
| GLCM1_BOVIN Glycosylation-dependent cell adhesion molecule 1 OS | NLQISNEDLSK                 | Phospho (ST)                |
| GLCM1_BOVIN Glycosylation-dependent cell adhesion molecule 1 OS | NLQISNEDLSK                 | 2 Phospho (ST)              |
| GLCM1_BOVIN Glycosylation-dependent cell adhesion molecule 1 OS | EPSISREDLISK                | Phospho (ST)                |
| GLCM1_BOVIN Glycosylation-dependent cell adhesion molecule 1 OS | EDLISKEQIVIR                | Phospho (ST)                |
| GLCM1_BOVIN Glycosylation-dependent cell adhesion molecule 1 OS | EPSISREDLISK                | 2 Phospho (ST)              |
| GLCM1_BOVIN Glycosylation-dependent cell adhesion molecule 1 OS | EPSISREDLISK                | 3 Phospho (ST)              |
| GLCM1_BOVIN Glycosylation-dependent cell adhesion molecule 1 OS | NLQISNEDLSKEPSISR           | Phospho (ST)                |
| GLCM1_BOVIN Glycosylation-dependent cell adhesion molecule 1 OS | NLQISNEDLSKEPSISR           | 2 Phospho (ST)              |
| GLCM1_BOVIN Glycosylation-dependent cell adhesion molecule 1 OS | NLQISNEDLSKEPSISR           | 3 Phospho (ST)              |
| GLCM1_BOVIN Glycosylation-dependent cell adhesion molecule 1 OS | NLQISNEDLSKEPSISR           | 4 Phospho (ST)              |
| GLCM1_BOVIN Glycosylation-dependent cell adhesion molecule 1 OS | NLQISNEDLSKEPSISREDLISK     | Phospho (ST)                |
| GLCM1_BOVIN Glycosylation-dependent cell adhesion molecule 1 OS | NLQISNEDLSKEPSISREDLISK     | 3 Phospho (ST)              |
| GLCM1_BOVIN Glycosylation-dependent cell adhesion molecule 1 OS | NLQISNEDLSKEPSISREDLISK     | 4 Phospho (ST)              |
| GLCM1_BOVIN Glycosylation-dependent cell adhesion molecule 1 OS | NLQISNEDLSKEPSISREDLISK     | 5 Phospho (ST)              |

|                                                                 |                             |                               |
|-----------------------------------------------------------------|-----------------------------|-------------------------------|
| E1BHI7_BOVIN Butyrophilin subfamily 1 member A1 OS=Bos taurus G | VSPAVFVSR                   | Phospho (ST)                  |
| F1MXX6_BOVIN Lactadherin OS=Bos taurus GN=MFG8 PE=1 SV=1        | AGSAEYLK                    | Phospho (ST)                  |
| C6KEF7_BOVIN Growth/differentiation factor 8 OS=Bos taurus GN=M | DASSDGSLEDDDYHAR            | Phospho (ST)                  |
| F1MRM8_BOVIN G-protein-coupled receptor family C group 5 member | ATANSQVTGSANSTLR            | 2 Phospho (ST)                |
| F1MHI1_BOVIN Perilipin OS=Bos taurus GN=PLIN2 PE=3 SV=1         | LGSLSTK                     | Phospho (ST)                  |
| Q3SX32_BOVIN Perilipin OS=Bos taurus GN=M6PRBP1 PE=2 SV=1       | LGSLSER                     | Phospho (ST)                  |
| E1BPQ9_BOVIN Uncharacterized protein OS=Bos taurus GN=IGSF5 PE= | SANENYGYHSDESR              | Phospho (ST)                  |
| F1MX65_BOVIN Protein OS-9 OS=Bos taurus GN=OS9 PE=1 SV=1        | KPPSPQSTEEDPEHR             | Phospho (ST)                  |
| CASA1_BOVIN Alpha-S1-casein OS=Bos taurus GN=CSN1S1 PE=1 SV=2   | EKVNELSK                    | Phospho (ST)                  |
| CASA1_BOVIN Alpha-S1-casein OS=Bos taurus GN=CSN1S1 PE=1 SV=2   | KYKVPQLEIVPNSAEER           | Phospho (ST)                  |
| CASA1_BOVIN Alpha-S1-casein OS=Bos taurus GN=CSN1S1 PE=1 SV=2   | QMEAESISSSEIIVPNSVEQK       | Oxidation (M); 5 Phospho (ST) |
| CASA1_BOVIN Alpha-S1-casein OS=Bos taurus GN=CSN1S1 PE=1 SV=2   | EKVNELSKDIGESTEDQAMEDIK     | Oxidation (M); 3 Phospho (ST) |
| CASA2_BOVIN Alpha-S2-casein OS=Bos taurus GN=CSN1S2 PE=1 SV=2   | NAVPIPTLNR                  | Phospho (ST)                  |
| CASA2_BOVIN Alpha-S2-casein OS=Bos taurus GN=CSN1S2 PE=1 SV=2   | NTMEHVSSSEIISQETYK          | Phospho (ST)                  |
| CASA2_BOVIN Alpha-S2-casein OS=Bos taurus GN=CSN1S2 PE=1 SV=2   | NANEEEYSIGSSSEESAEEVATEEVK  | 4 Phospho (ST); Phospho (Y)   |
| F1MI46_BOVIN Osteopontin OS=Bos taurus GN=SPP1 PE=1 SV=1        | IRISHELDSASSEVN             | 3 Phospho (ST)                |
| F1MI46_BOVIN Osteopontin OS=Bos taurus GN=SPP1 PE=1 SV=1        | SNVQSPDATEEDFTSHIESEEMHDAPK | Oxidation (M); 2 Phospho (ST) |
| F1MI46_BOVIN Osteopontin OS=Bos taurus GN=SPP1 PE=1 SV=1        | RSNVQSPDATEEDFTSHIESEEMHDAP | 2 Phospho (ST)                |
| F1MI46_BOVIN Osteopontin OS=Bos taurus GN=SPP1 PE=1 SV=1        | RSNVQSPDATEEDFTSHIESEEMHDAP | 3 Phospho (ST)                |
| OSTK_BOVIN Osteopontin-K OS=Bos taurus PE=2 SV=1                | IRISHELDSASSEVN             | 3 Phospho (ST)                |
| TRY1_BOVIN Cationic trypsin OS=Bos taurus PE=1 SV=3             | SSGTSYPDVLK                 | Phospho (Y)                   |
| F1MVT9_BOVIN Uncharacterized protein OS=Bos taurus GN=SPOCK1 PE | VINPTSSETAQGR               | Phospho (ST)                  |
| SEP15_BOVIN 15 kDa selenoprotein OS=Bos taurus GN=SEP15 PE=2 SV | WNTDSVEEFLSEK               | Phospho (ST)                  |
| NUCB1_BOVIN Nucleobindin-1 OS=Bos taurus GN=NUCB1 PE=2 SV=1     | LSQETEALGR                  | Phospho (ST)                  |
| NUCB1_BOVIN Nucleobindin-1 OS=Bos taurus GN=NUCB1 PE=2 SV=1     | AQRLSQETEALGR               | Phospho (ST)                  |
| BOJYN6_BOVIN Alpha-2-HS-glycoprotein OS=Bos taurus GN=AHSG PE=1 | CDSSPDSAEDVRK               | Phospho (ST)                  |
| SIL1_BOVIN Nucleotide exchange factor SIL1 OS=Bos taurus GN=SIL | KETEEELEPK                  | Phospho (ST)                  |
| SIL1_BOVIN Nucleotide exchange factor SIL1 OS=Bos taurus GN=SIL | EGAEMENSKEDQER              | Phospho (ST)                  |
| SIL1_BOVIN Nucleotide exchange factor SIL1 OS=Bos taurus GN=SIL | EGAEMENSKEDQER              | Oxidation (M); Phospho (ST)   |
| PIGR_BOVIN Polymeric immunoglobulin receptor OS=Bos taurus GN=P | SPIFGPEEVTVEGR              | Phospho (ST)                  |
| F1MHI1_BOVIN Perilipin OS=Bos taurus GN=PLIN2 PE=3 SV=1         | KDQYPYLK                    | Phospho (Y)                   |
| A0A140T8A9_BOVIN Kappa-casein OS=Bos taurus GN=CSN3 PE=1 SV=1   | SCQAQPTTMAR                 | Oxidation (M); Phospho (ST)   |
| HS90A_BOVIN Heat shock protein HSP 90-alpha OS=Bos taurus GN=HS | ESDDKPEIEDVGSDEEEEEK        | Phospho (ST)                  |
| A0A140T8C8_BOVIN Kininogen-1 OS=Bos taurus GN=KNG1 PE=1 SV=1    | ETTCCKGSNEELTK              | Phospho (ST)                  |
| RAN_BOVIN GTP-binding nuclear protein Ran OS=Bos taurus GN=RAN  | LVLVGDGGTGK                 | Phospho (ST)                  |
| B5UBG1_BOVIN Calcitonin OS=Bos taurus GN=CT PE=2 SV=1           | DVANSLER                    | Phospho (ST)                  |
| F1N5I2_BOVIN Uncharacterized protein OS=Bos taurus GN=DLGAP4 PE | AMGDEDSDESGGSPKPSPK         | Phospho (ST)                  |
| F1N5I2_BOVIN Uncharacterized protein OS=Bos taurus GN=DLGAP4 PE | AMGDEDSDESGGSPKPSPK         | 2 Phospho (ST)                |
| E1BF27_BOVIN Uncharacterized protein OS=Bos taurus GN=SLC38A10  | MPGSPEQHGAGDVPQSR           | Phospho (ST)                  |
| B4GT1_BOVIN Beta-1,4-galactosyltransferase 1 OS=Bos taurus GN=B | LPQLVGVHPPLQGSSHGAAAIGQPSGE | Phospho (ST)                  |
| CASA1_BOVIN Alpha-S1-casein OS=Bos taurus GN=CSN1S1 PE=1 SV=2   | DIGSESTEDQAMEDIK            | Oxidation (M); 3 Phospho (ST) |
| CASB_BOVIN Beta-casein OS=Bos taurus GN=CSN2 PE=1 SV=2          | ELEELNVPGEIVESLSSEESITR     | 5 Phospho (ST)                |

|                                                                 |                             |                               |
|-----------------------------------------------------------------|-----------------------------|-------------------------------|
| TRY1_BOVIN Cationic trypsin OS=Bos taurus PE=1 SV=3             | APILSDSSCK                  | Phospho (ST)                  |
| CASA2_BOVIN Alpha-S2-casein OS=Bos taurus GN=CSN1S2 PE=1 SV=2   | ENLCSTFCK                   | Phospho (ST)                  |
| CASA2_BOVIN Alpha-S2-casein OS=Bos taurus GN=CSN1S2 PE=1 SV=2   | NMAINPSKENLCSTFCK           | 2 Phospho (ST)                |
| CASA2_BOVIN Alpha-S2-casein OS=Bos taurus GN=CSN1S2 PE=1 SV=2   | NTMEHVSSSEESIISQETYSK       | 3 Phospho (ST)                |
| CASA2_BOVIN Alpha-S2-casein OS=Bos taurus GN=CSN1S2 PE=1 SV=2   | NTMEHVSSSEESIISQETYSK       | 3 Phospho (ST); Phospho (Y)   |
| CASA2_BOVIN Alpha-S2-casein OS=Bos taurus GN=CSN1S2 PE=1 SV=2   | NTMEHVSSSEESIISQETYSK       | Oxidation (M); 4 Phospho (ST) |
| CASA2_BOVIN Alpha-S2-casein OS=Bos taurus GN=CSN1S2 PE=1 SV=2   | NANEEEEYSIGSSSEESAEEVATEEVK | 3 Phospho (ST)                |
| CASA2_BOVIN Alpha-S2-casein OS=Bos taurus GN=CSN1S2 PE=1 SV=2   | NANEEEEYSIGSSSEESAEEVATEEVK | 5 Phospho (ST)                |
| F1MI46_BOVIN Osteopontin OS=Bos taurus GN=SPP1 PE=1 SV=1        | KTSQLTDHSK                  | Phospho (ST)                  |
| F1MI46_BOVIN Osteopontin OS=Bos taurus GN=SPP1 PE=1 SV=1        | LSQEFHSLEDK                 | Phospho (ST)                  |
| OSTK_BOVIN Osteopontin-K OS=Bos taurus PE=2 SV=1                | LSQEFHSLEDK                 | Phospho (ST)                  |
| BT1A1_BOVIN Butyrophilin subfamily 1 member A1 OS=Bos taurus GN | VSPAVFVSR                   | Phospho (ST)                  |
| BT1A1_BOVIN Butyrophilin subfamily 1 member A1 OS=Bos taurus GN | EIPLSPMGEDSASGDIETLHSK      | 2 Phospho (ST)                |
| GLCM1_BOVIN Glycosylation-dependent cell adhesion molecule 1 OS | NATLGSEETTEHTPSDASTTEGK     | Phospho (ST)                  |
| CO3_BOVIN Complement C3 OS=Bos taurus GN=C3 PE=1 SV=2           | EEVPAADLSDQVPDTESETK        | Phospho (ST)                  |
| F1MMF7_BOVIN Uncharacterized protein OS=Bos taurus GN=C17orf80  | MLKDTPKPKVASR               | Phospho (ST)                  |
| F1MJQ4_BOVIN Uncharacterized protein OS=Bos taurus GN=P4HA2 PE= | GQEFRLPCGSTEVD              | Phospho (ST)                  |
| F1MNT4_BOVIN Uncharacterized protein OS=Bos taurus GN=LAMB1 PE= | NFLTQDSADLDSIEAVANEVLK      | 2 Phospho (ST)                |
| F1N2Y2_BOVIN Uncharacterized protein OS=Bos taurus GN=COL5A2 PE | GPVGSSEPKGGQGDPRGPEGLPGAR   | 2 Phospho (ST)                |
| E1BIT6_BOVIN Uncharacterized protein OS=Bos taurus GN=ALOXE3 PE | MALYRVRVTTGPYLMAGTLDNIFVTLV | Oxidation (M); 4 Phospho (ST) |
